# Supplementary material
Source: PubMed Central journal article supplement (PMC6062837)
Supplement: oc8b00359_si_001.pdf [file oc8b00359_si_001.pdf]

**Supporting Information**

**In-situ Coupling of Multidimensional MOFs for  
Heterogeneous Metal Oxide Architectures:  
Toward Sensitive Chemiresistor**

*Ji-Soo Jang,<sup>†,‡</sup> Won-Tae Koo,<sup>†,‡</sup> Dong-Ha Kim,<sup>†,‡</sup> and Il-Doo Kim<sup>†,‡,\*</sup>*

<sup>†</sup>Department of Materials Science and Engineering, Korea Advanced Institute of Science and Technology, 291 Daehak-ro, Yuseong-gu, Daejeon 305-701, Republic of Korea

<sup>‡</sup>Advanced Nanosensor Research Center, KI Nanocentury, KAIST, 291 Daehak-ro, Yuseong-gu Daejeon 34141, Republic of Korea

\*E-mail: idkim@kaist.ac.kr

## **Table of Contents**

- S1.** Additional TEM analysis and EDS mapping images
  - S2.** XRD analysis
  - S3.** Schematic illustration of fabrication process of ZIF-67 NRs
  - S4.** XRD analysis of various double- $\text{Co}_3\text{O}_4$  rods@ZnO sheets
  - S5.** SEM images of double- $\text{Co}_3\text{O}_4$  rods@ZnO sheets depending on the calcination temperature
  - S6.** SEM image of polyhedron ZIF-67 particles
  - S7.** SEM image of Zn based ZIF-L
  - S8.** SEM and TEM images of collapsed  $\text{Co}_3\text{O}_4$  rods loaded ZnO sheet
  - S9.** EDS mapping images of calcined HMOFs
  - S10.** XPS spectra of heterogeneous  $\text{Co}_3\text{O}_4$  rods@ZnO sheet
  - S11.** Temperature dependent acetone response
  - S12.** Extrapolation of the double- $\text{Co}_3\text{O}_4$  rods@ZnO sheet's detection limit
  - S13.** Resistance variation of  $\text{Co}_3\text{O}_4$  rods, ZnO sheet, single- $\text{Co}_3\text{O}_4$  rods@ZnO sheet, double- $\text{Co}_3\text{O}_4$  rods@ZnO sheet, and triple- $\text{Co}_3\text{O}_4$  rods@ZnO sheet
  - S14.** XPS spectra of oxygen
  - S15.**  $\text{N}_2$  adsorption/desorption isotherms
  - S16.** Schematic image of sensing measurement system
- 
- Table S1.** The pH values of 4 ZIFs solutions
  - Table S2.** Grain sizes of samples based on the (100), (002), and (101) peaks
  - Table S3** ICP results
  - Table S4.** The surface area under XPS spectra of O 1s
  - Table S5** Recent publications on MOF derived SMOs based chemiresistive acetone sensors
  - Table S4.** Recent publications on MOF based chemiresistive sensors

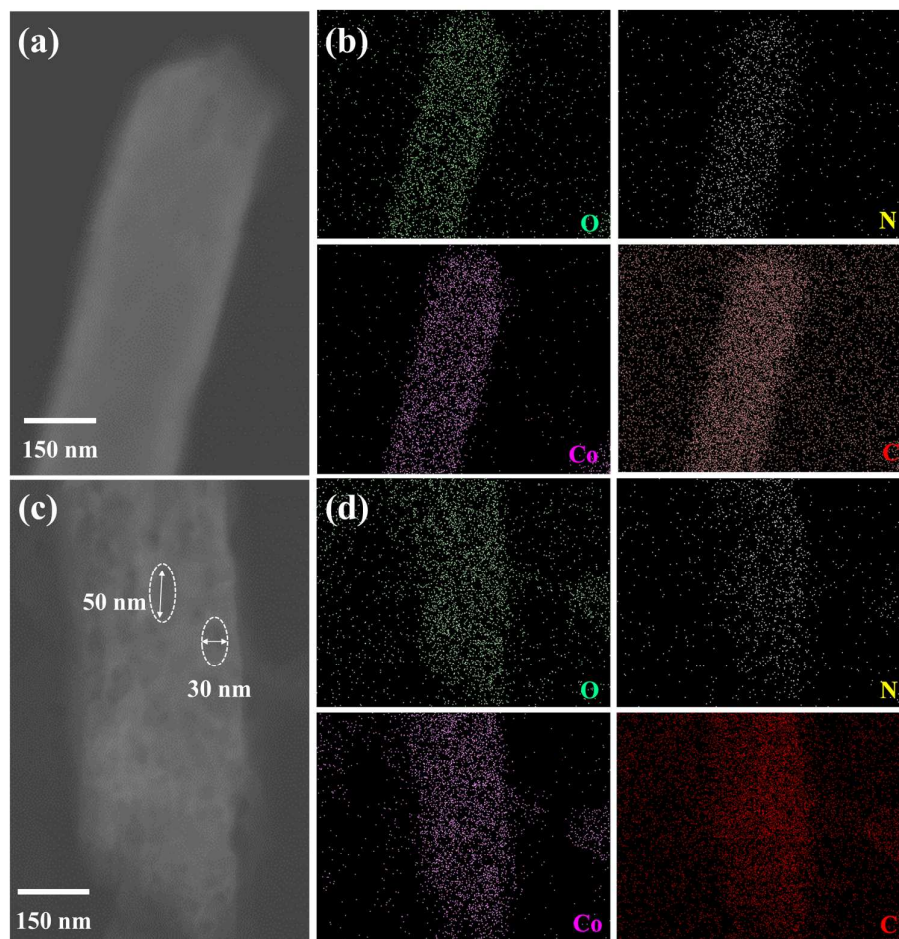

**Figure S1.** STEM images of (a) ZIF-67 rods and (c) ZIF-67 belts, EDS mapping images of (b) ZIF-67 rods and (d) ZIF-67 belts with Co, O, C, and N elements.

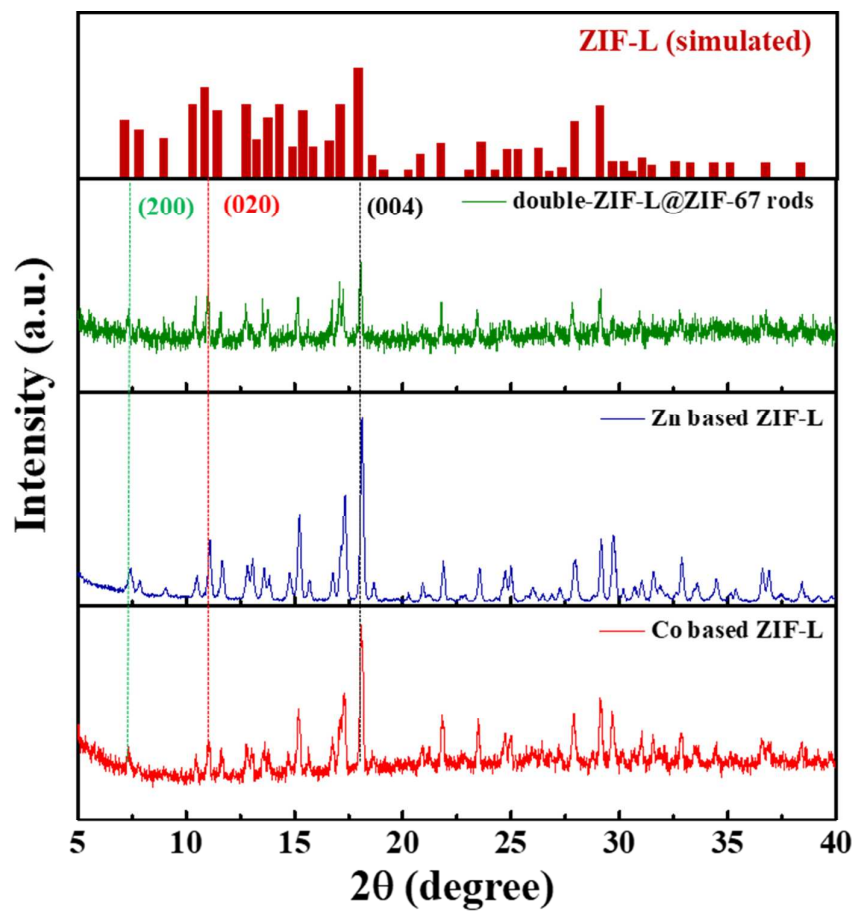

**Figure S2.** XRD analysis of Co based ZIF-L, Zn based ZIF-L, and double-ZIF-L@ZIF-67 rods.

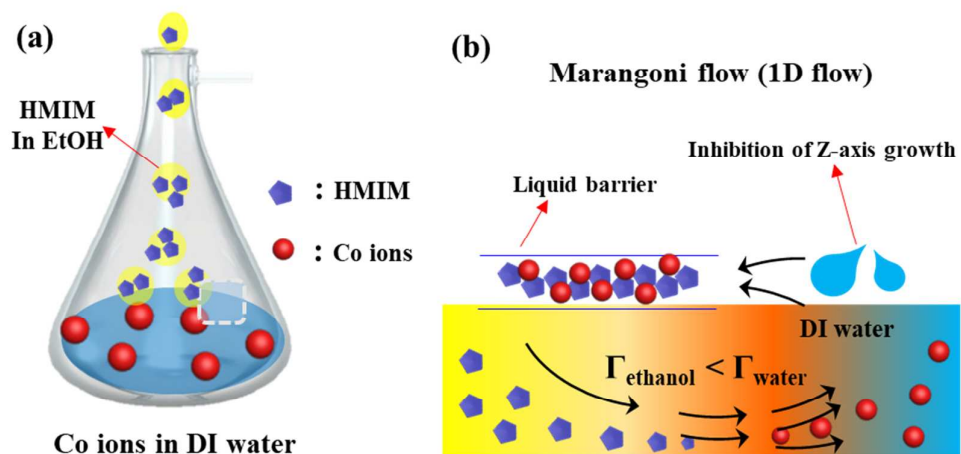

**Figure S3.** (a) Schematic image showing mixing process of HMIM dissolved solution and Co ions dissolved solution, (b) schematic illustration of Marangoni flow between HMIM-EtOH and Co ions-DI water solutions.

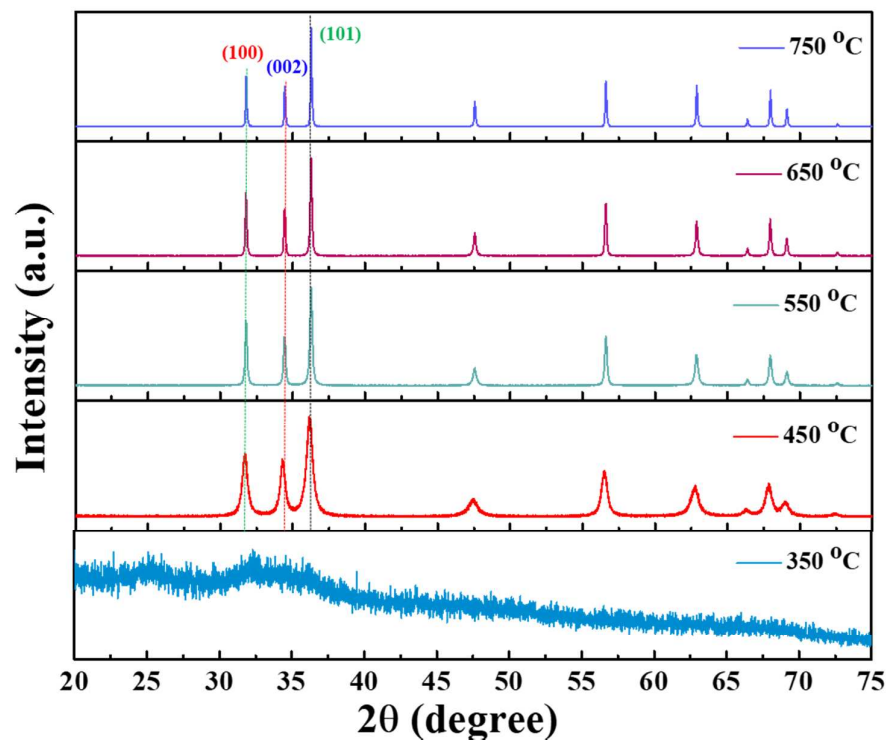

**Figure S4.** XRD analysis of various double-Co<sub>3</sub>O<sub>4</sub> rods@ZnO sheets (e.g. 350 double-Co<sub>3</sub>O<sub>4</sub> rods@ZnO sheet, 450 double-Co<sub>3</sub>O<sub>4</sub> rods@ZnO sheet, 550 double-Co<sub>3</sub>O<sub>4</sub> rods@ZnO sheet, 650 double-Co<sub>3</sub>O<sub>4</sub> rods@ZnO sheet, and 750 double-Co<sub>3</sub>O<sub>4</sub> rods@ZnO sheet)

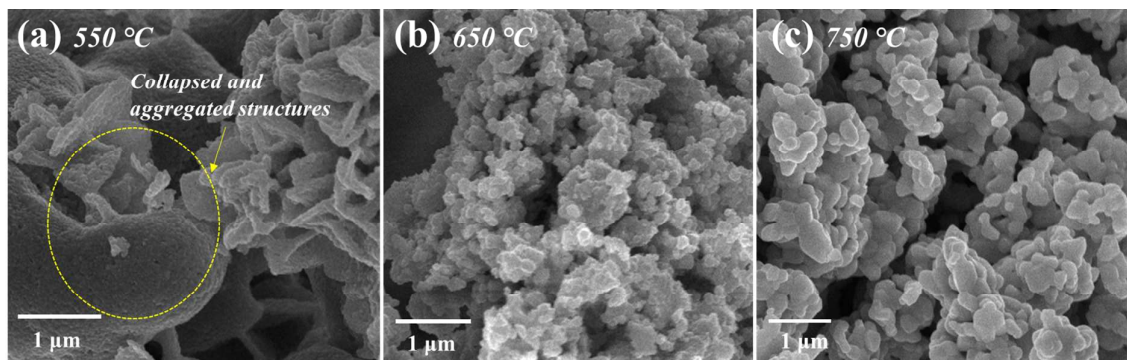

**Figure S5.** SEM image of (a) 550 double-Co<sub>3</sub>O<sub>4</sub> rods@ZnO sheets, (b) 650 double-Co<sub>3</sub>O<sub>4</sub> rods@ZnO sheets, and (c) 750 double-Co<sub>3</sub>O<sub>4</sub> rods@ZnO sheets.

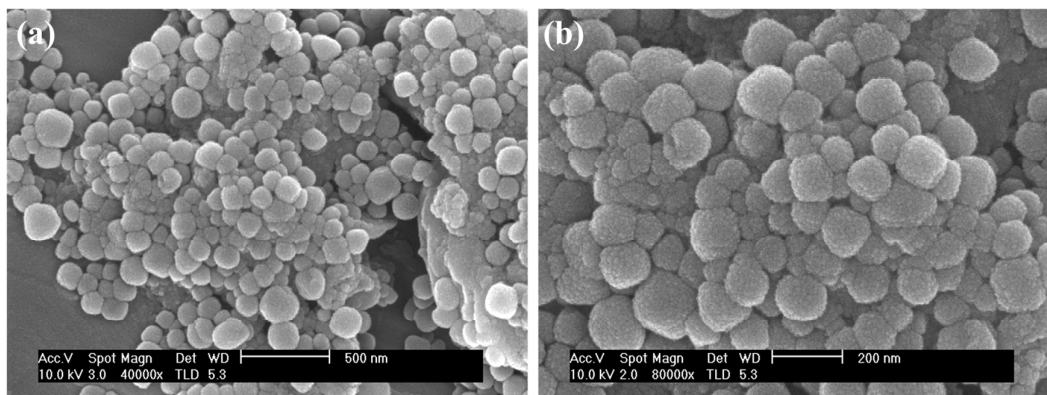

**Figure S6.** (a) SEM image of polyhedron ZIF-67 particles produced by using mixed solvent of DI water and EtOH. (b) Magnified SEM image of polyhedron ZIF-67.



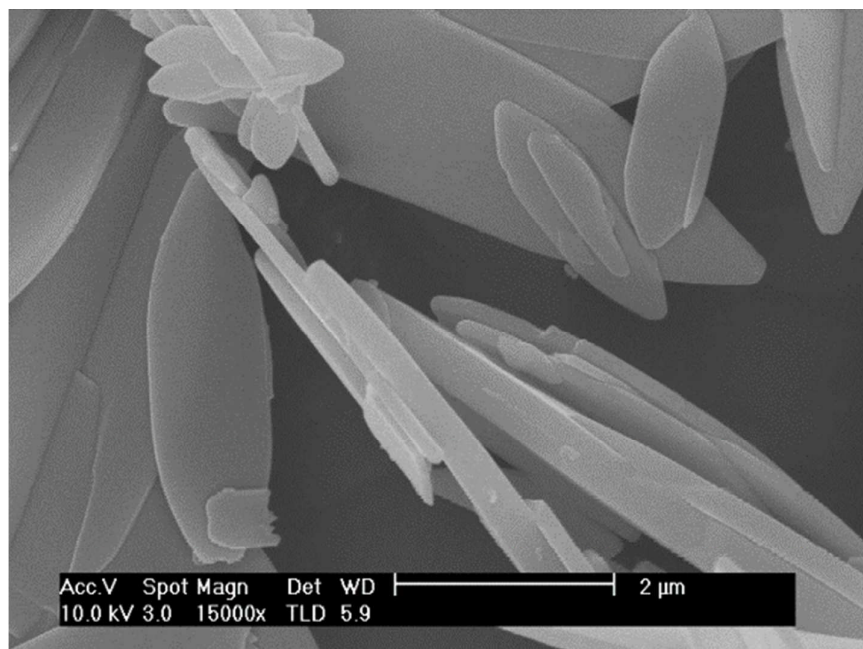

**Figure S7.** SEM image of Zn based ZIF-L structures.

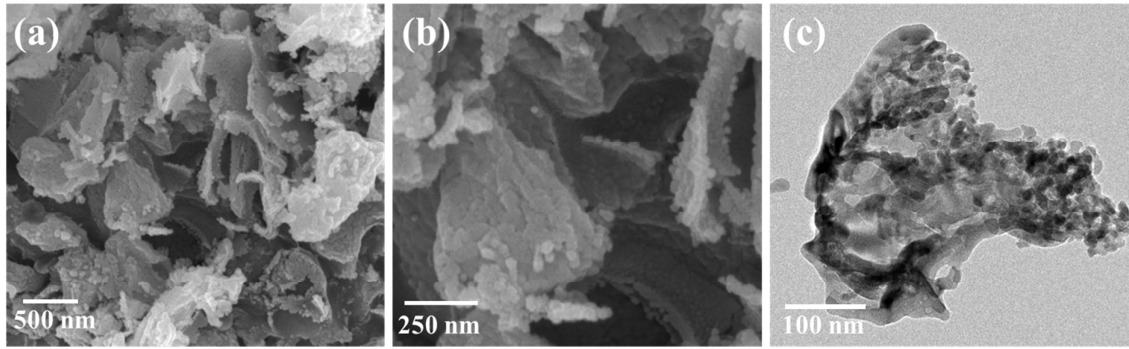

**Figure S8.** SEM images of (a, b) collapsed  $\text{Co}_3\text{O}_4$  rods loaded ZnO sheet, and (c) TEM image of collapsed  $\text{Co}_3\text{O}_4$  rods loaded ZnO sheet.

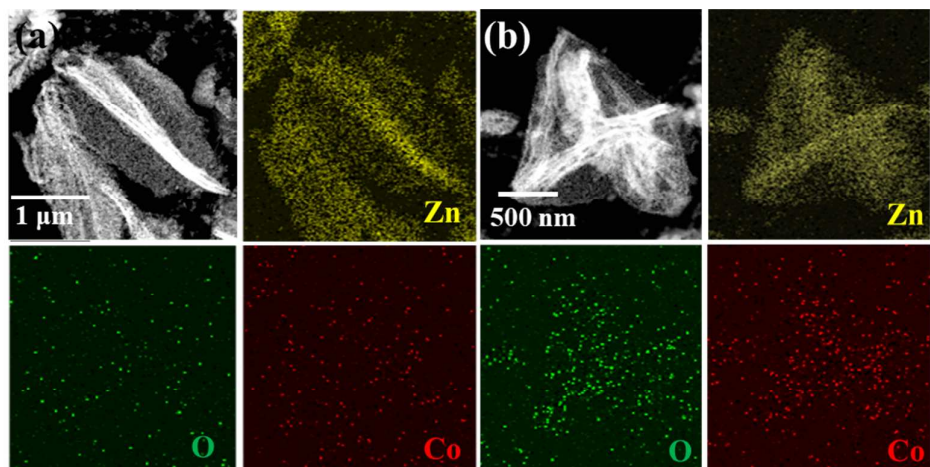

**Figure S9.** EDS mapping images of (a) single-Co<sub>3</sub>O<sub>4</sub> rods@ZnO sheet, and (b) double-Co<sub>3</sub>O<sub>4</sub> rods@ZnO sheet.

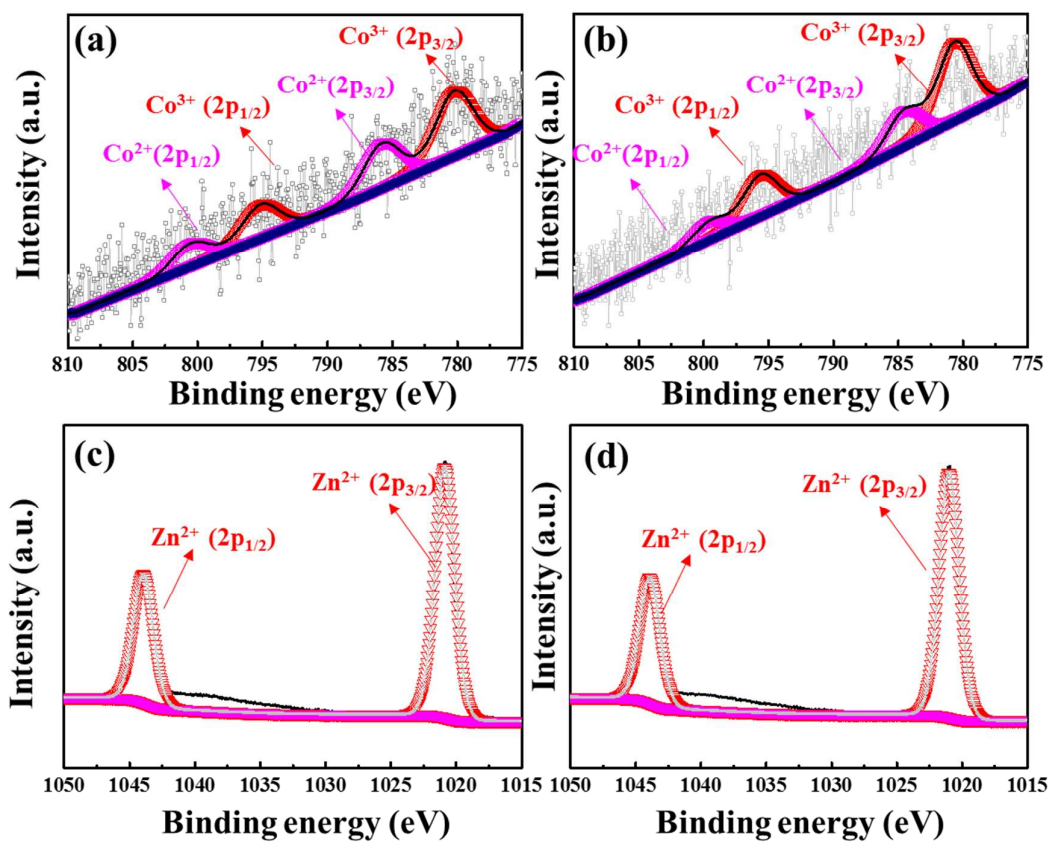

Figure S10. XPS spectra of single-Co<sub>3</sub>O<sub>4</sub> rods@ZnO sheet: (a) Co 2p and (c) Zn 2p, and XPS spectra of double-Co<sub>3</sub>O<sub>4</sub> rods@ZnO sheet: (b) Co 2p and (d) Zn 2p.

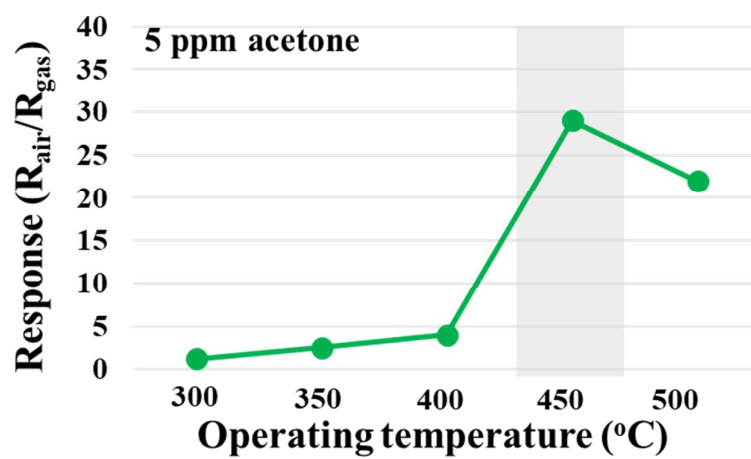

**Figure S11.** Acetone sensing response of double- $\text{Co}_3\text{O}_4$  rods@ZnO sheet at various sensing temperatures.

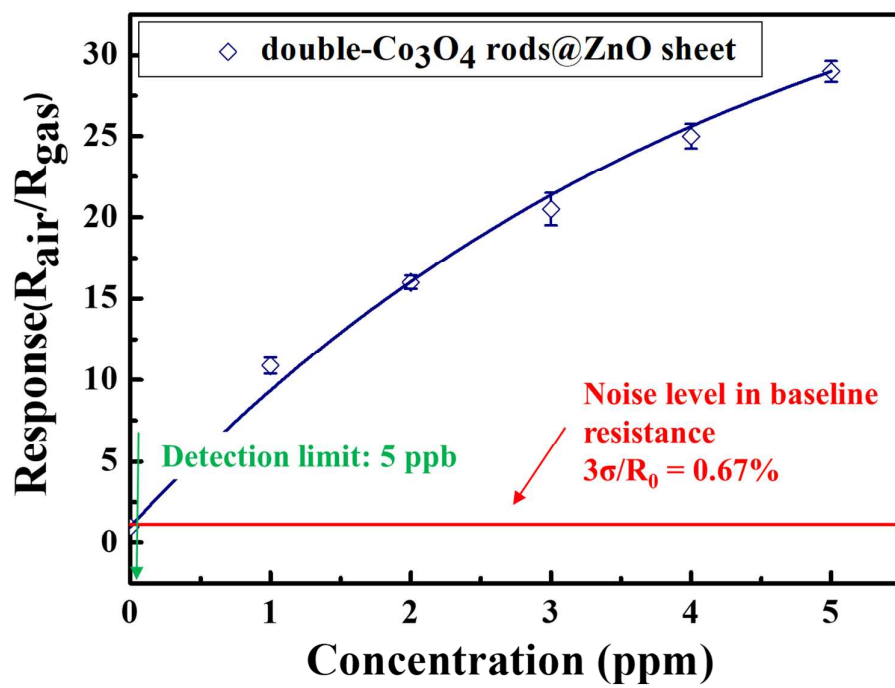

Figure S12. Extrapolation of the double- $\text{Co}_3\text{O}_4$  rods@ZnO sheet's detection limit toward acetone gas at 450 □

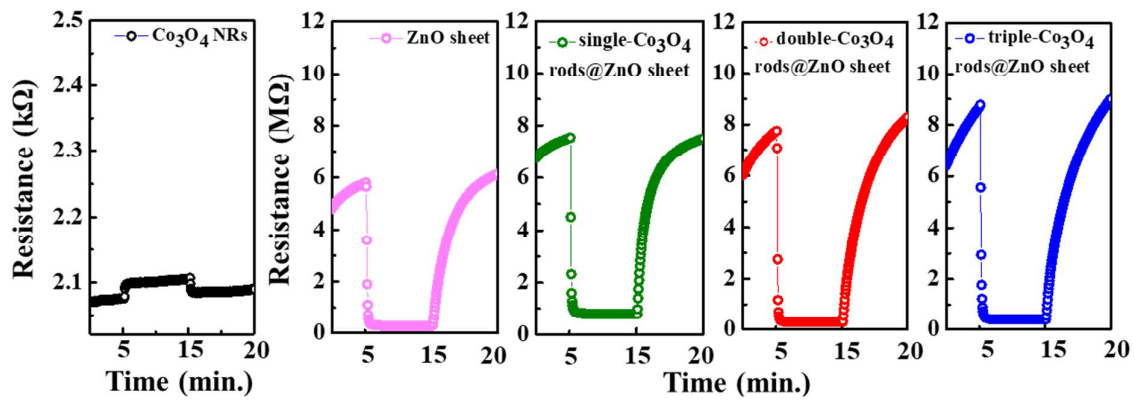

**Figure S13.** Resistance variation of Co<sub>3</sub>O<sub>4</sub> rods, ZnO sheet, single-Co<sub>3</sub>O<sub>4</sub> rods@ZnO sheet, double-Co<sub>3</sub>O<sub>4</sub> rods@ZnO sheet, and triple-Co<sub>3</sub>O<sub>4</sub> rods@ZnO sheet upon exposure to 5 ppm of acetone at 450 °C.

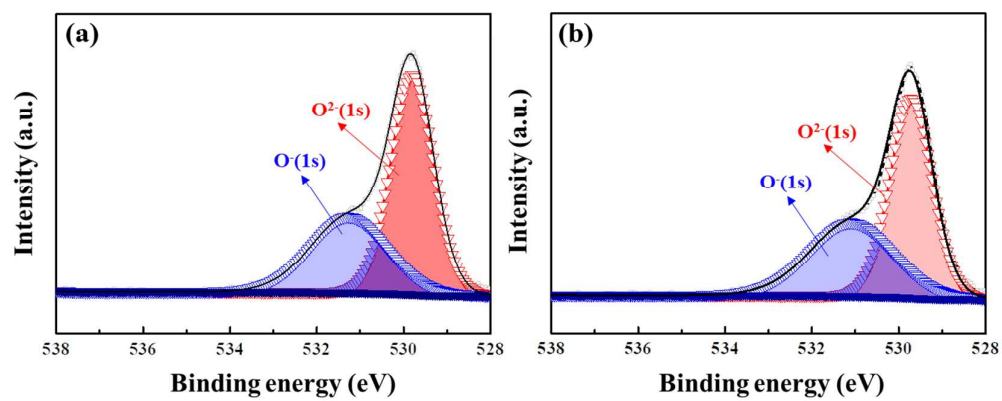

**Figure S14.** XPS spectra of oxygen in (a) single-Co<sub>3</sub>O<sub>4</sub> rods@ZnO sheet, and (b) triple-Co<sub>3</sub>O<sub>4</sub> rods@ZnO sheet.



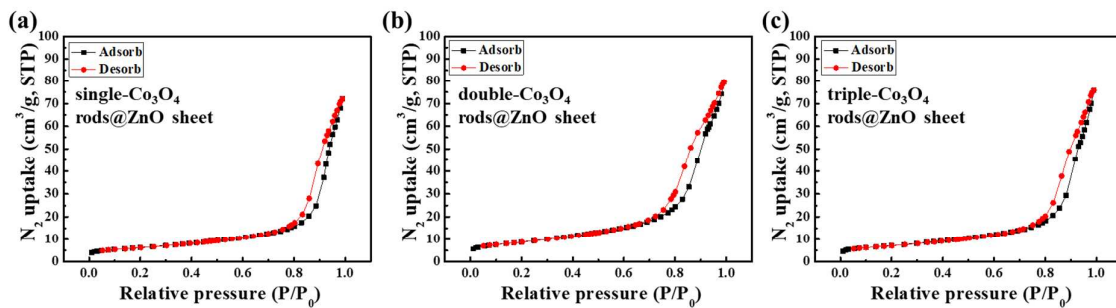

**Figure S15.** N<sub>2</sub> adsorption/desorption isotherms of (a) single-Co<sub>3</sub>O<sub>4</sub> rods@ZnO sheet, (b) double-Co<sub>3</sub>O<sub>4</sub> rods@ZnO sheet, and (c) triple-Co<sub>3</sub>O<sub>4</sub> rods@ZnO sheet.

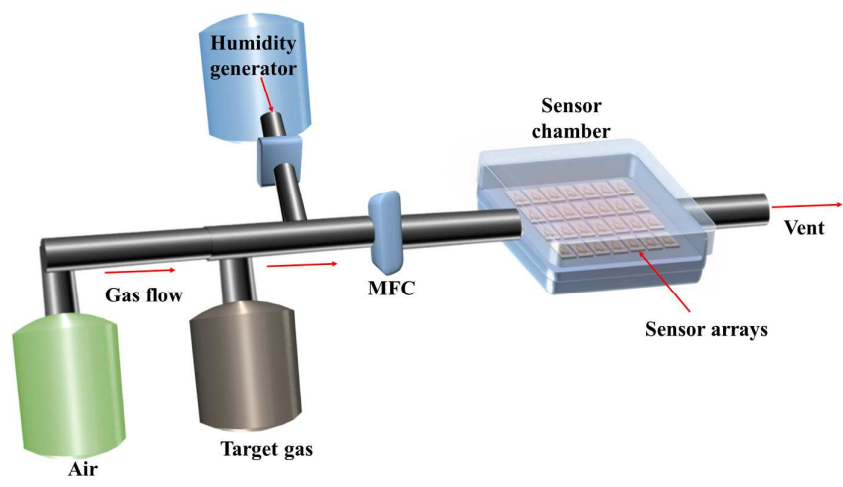

**Figure S16.** Schematic image of sensing measurement system.

**Table S1.** The pH values of 4 ZIFs solutions

| <b>Solution</b>                            | <b>pH</b> |
|--------------------------------------------|-----------|
| DI water+Co ions + HMIM                    | 8.47      |
| Methanol+Co ions + HMIM                    | 7.59      |
| DI water/EtOH (2/1) + Co ions + HMIM, belt | 8.22      |
| DI water/EtOH (1/2) + Co ions + HMIM, rod  | 8.05      |

**Table S2.** Grain sizes of samples based on the (100), (002), and (101) peaks.

|              | 450 double-Co <sub>3</sub> O <sub>4</sub><br>rods@ZnO sheet | 550 double-Co <sub>3</sub> O <sub>4</sub><br>rods@ZnO sheet | 650 double-Co <sub>3</sub> O <sub>4</sub><br>rods@ZnO sheet | 750 double-Co <sub>3</sub> O <sub>4</sub><br>rods@ZnO sheet |
|--------------|-------------------------------------------------------------|-------------------------------------------------------------|-------------------------------------------------------------|-------------------------------------------------------------|
| <b>(100)</b> | 30.7 nm                                                     | 54.6 nm                                                     | 71.9 nm                                                     | 92.5 nm                                                     |
| <b>(002)</b> | 35 nm                                                       | 55.6 nm                                                     | 71.3 nm                                                     | 94.4 nm                                                     |
| <b>(101)</b> | 29.5 nm                                                     | 50.5 nm                                                     | 65.2 nm                                                     | 91.2 nm                                                     |
| <b>Aver.</b> | 31.7 nm                                                     | 53.6 nm                                                     | 69.5 nm                                                     | 92.7 nm                                                     |

**Table S3.** ICP results of single-Co<sub>3</sub>O<sub>4</sub> NRs@ZnO NSs, double-Co<sub>3</sub>O<sub>4</sub> NRs@ZnO NSs, and triple-Co<sub>3</sub>O<sub>4</sub> NRs@ZnO NSs

| <b>ICP analysis</b>                               |               |               |
|---------------------------------------------------|---------------|---------------|
| <b>Samples</b>                                    | <b>Co (%)</b> | <b>Zn (%)</b> |
| single-Co <sub>3</sub> O <sub>4</sub> NRs@ZnO NSs | 0.27          | 80.0          |
| double-Co <sub>3</sub> O <sub>4</sub> NRs@ZnO NSs | 0.71          | 79.6          |
| triple-Co <sub>3</sub> O <sub>4</sub> NRs@ZnO NSs | 1.82          | 78.4          |

**Table S4.** The surface area under XPS spectra of O 1s in single-Co<sub>3</sub>O<sub>4</sub> rods@ZnO sheet, double-Co<sub>3</sub>O<sub>4</sub> rods@ZnO sheet, and triple-Co<sub>3</sub>O<sub>4</sub> rods@ZnO sheet.

| <b>Spectral Feature Table</b>                                             |                         |                              |                                     |
|---------------------------------------------------------------------------|-------------------------|------------------------------|-------------------------------------|
| <b>Element/Transition</b>                                                 | <b>Peak Energy (eV)</b> | <b>Peak Area (eV counts)</b> | <b>O<sup>-</sup>/O<sup>2-</sup></b> |
| O <sup>2-</sup> (1s) in Single-Co <sub>3</sub> O <sub>4</sub> NRs@ZnO NSs | 530.2                   | 60693.83                     | 0.615                               |
| O <sup>-</sup> (1s) in Single-Co <sub>3</sub> O <sub>4</sub> NRs@ZnO NSs  | 531.0                   | 37325.69                     |                                     |
| O <sup>2-</sup> (1s) in Double-Co <sub>3</sub> O <sub>4</sub> NRs@ZnO NSs | 530.2                   | 47322.30                     | 1.203                               |
| O <sup>-</sup> (1s) in Double-Co <sub>3</sub> O <sub>4</sub> NRs@ZnO NSs  | 531.0                   | 56943.89                     |                                     |
| O <sup>2-</sup> (1s) in Triple-Co <sub>3</sub> O <sub>4</sub> NRs@ZnO NSs | 530.2                   | 54250.09                     | 0.727                               |
| O <sup>-</sup> (1s) in Triple-Co <sub>3</sub> O <sub>4</sub> NRs@ZnO NSs  | 531.0                   | 39428.26                     |                                     |

**Table S5.** Recent publications on MOF derived SMOs based chemiresistive acetone sensors.

| <b>Gas species</b>                                                 | <b>Materials</b>                                                                                  | <b>Optimal temperature</b> | <b>Limit of detection</b> | <b>Response</b>        | <b>Reference</b> |
|--------------------------------------------------------------------|---------------------------------------------------------------------------------------------------|----------------------------|---------------------------|------------------------|------------------|
| Acetone                                                            | ZnO@ZIF-CoZn nanowire                                                                             | 260 °C                     | 1.9 ppb                   | 12–13.5 @ 5 ppm        | 1                |
|                                                                    | MOF templated Cu <sub>2</sub> O/CuO cages                                                         | 150 °C                     | N/A                       | 2.6–3 @ 200 ppm        | 2                |
|                                                                    | MOF templated ZnO nanocages                                                                       | 300 °C                     | 100 ppb                   | 2.2 @ 0.1 ppm          | 3                |
|                                                                    | MOF templated PdO-ZnO loaded SnO <sub>2</sub> nanotubes                                           | 400 °C                     | 10 ppb                    | 10 @ 5 ppm             | 4                |
|                                                                    | MOF templated ZnO/ZnCo <sub>2</sub> O <sub>4</sub> hollow spheres                                 | 250 °C                     | N/A                       | 1.7 @ 5 ppm            | 5                |
|                                                                    | MOF derived PdO loaded Co <sub>3</sub> O <sub>4</sub> cubes                                       | 350 °C                     | 0.1 ppm                   | 2.51 @ 5 ppm           | 6                |
|                                                                    | MOF templated ZnO/ZnFe <sub>2</sub> O <sub>4</sub> nanospheres                                    | 290 °C                     | 1 pm                      | 10 @ 25 ppm, 5 @ 5 ppm | 7                |
|                                                                    | MOF derived Co <sub>3</sub> O <sub>4</sub> /NiCo <sub>2</sub> O <sub>3</sub> double-shelled cages | 228.9 °C                   | N/A                       | 3.09 @ 100 ppm         | 8                |
|                                                                    | MOF derived Co <sub>3</sub> O <sub>4</sub> -PdO loaded n-SnO <sub>2</sub> HNCs                    | 450 °C                     | 5 ppb                     | 22.8 @ 5ppm            | 9                |
| HMOF template double-Co <sub>3</sub> O <sub>4</sub> rods@ZnO sheet | 450 °C                                                                                            | 5 ppb                      | 29@5 ppm                  | this work              |                  |

**Table S6.** Recent publications on MOF based chemiresistive sensors.

| <b>Gas species</b>                                    | <b>Materials</b>                                                               | <b>Optimal temperature</b> | <b>Detection limit</b> | <b>Response</b>                                       | <b>Reference</b> |
|-------------------------------------------------------|--------------------------------------------------------------------------------|----------------------------|------------------------|-------------------------------------------------------|------------------|
| H <sub>2</sub> S                                      | ZIF-8                                                                          | Room temperature           | N/A                    | 3 @ 1ppm                                              | 10               |
| n-butanol                                             | SNNU-50                                                                        | Room temperature           | N/A                    | 1.56 @ 100 ppm                                        | 11               |
| H <sub>2</sub> S                                      | Cu(bdc) xH <sub>2</sub> O                                                      | Room temperature           | N/A                    | 1–2 @ 1ppm                                            | 10               |
| H <sub>2</sub> S                                      | Fumarate based fcu-MOF                                                         | Room temperature           | 5.4 ppb                | 12–15 @ 10 ppm                                        | 10, 12           |
| N(CH <sub>3</sub> ) <sub>3</sub><br>(Trimethyl amine) | Co(im) <sub>2</sub> MOF                                                        | 75 °C                      | 2 ppm                  | 14 @ 100 ppm                                          | 13               |
| MeOH<br>Acetone                                       | Cu <sub>3</sub> (HTTP) <sub>2</sub>                                            | Room temperature           | N/A                    | 1.08 @ 200 ppm<br>(EtOH), ~1.02 @ 200 ppm (acetone)   | 14               |
| EtOH<br>Acetone                                       | Ni <sub>3</sub> (HITP) <sub>2</sub>                                            | Room temperature           | N/A                    | 1.03–1.04 @ 200 ppm (EtOH), ~1.02 @ 200 ppm (acetone) | 14, 15           |
| MeOH                                                  | MIL-53-NH <sub>2</sub><br>(Al)@polymer                                         | Room temperature           | N/A                    | 2.49 @ 5000 ppm                                       | 16, 17           |
| Formaldehyde<br>Acetone                               | ZIF-67                                                                         | 150 °C                     | 5 ppm                  | 13 @ 100 ppm (Formaldehyde)<br>7 @ 100 ppm (acetone)  | 18               |
| Acetone                                               | MOF derived Co <sub>3</sub> O <sub>4</sub> -PdO loaded n-SnO <sub>2</sub> HNCs | 450 °C                     | 5 ppb                  | 22.8 @ 5ppm                                           | 9                |
| Acetone                                               | HMOF template double-Co <sub>3</sub> O <sub>4</sub> rods@ZnO sheet             | 450 °C                     | 5 ppb                  | 29@5 ppm                                              | this work        |



## References

1. Yao, M. S.; Tang, W. X.; Wang, G. E.; Nath, B.; Xu, G. MOF Thin Film Coated Metal Oxide Nanowire Array: Significantly Improved Chemiresistor Sensor Performance. *Adv. Mater.* **2016**, *28*, 5229-5234.
2. Wang, Y.; Lü, Y.; Zhan, W.; Xie, Z.; Kuang, Q.; Zheng, L. Synthesis of porous Cu<sub>2</sub>O/CuO Cages using Cu-based Metal-organic Frameworks as Templates and Their Gas-sensing Properties. *J. Mater. Chem. A*, **2015**, *3*, 12796.
3. Li, W.; Wu, X.; Han, N.; Chen, J.; Qian, X.; Deng, Y.; Tang, W.; Chen, Y. MOF-derived Hierarchical Hollow ZnO Nanocages with Enhanced Low-concentration VOCs Gas-sensing Performance. *Sensor. Actuat. B: Chem.*, **2016**, *225*, 158.
4. Koo, W.-T.; Jang, J.-S.; Choi, S.-J.; Cho, H.-J.; Kim, I.-D. Metal-Organic Framework Templated Catalysts: Dual Sensitization of PdO-ZnO Composite on Hollow SnO<sub>2</sub> Nanotubes for Selective Acetone Sensors. *ACS Appl. Mater. Inter.* **2017**, *9*, 18069.
5. Koo, W.-T.; Choi, S.-J.; Jang, J.-S.; Kim, I.-D. Metal-Organic Framework Templated Synthesis of Ultrasmall Catalyst Loaded ZnO/ZnCo<sub>2</sub>O<sub>4</sub> Hollow Spheres for Enhanced Gas Sensing Properties. *Sci. Rep.* **2017**, *7*, 45074.
6. Koo, W.-T.; Yu, S.; Choi, S.-J.; Jang, J.-S.; Cheong, J. Y.; Kim, I.-D. Nanoscale PdO Catalyst Functionalized Co<sub>3</sub>O<sub>4</sub> Hollow Nanocages Using MOF Templates for Selective Detection of Acetone Molecules in Exhaled Breath. *ACS Appl. Mater. Inter.*, **2017**, *9*, 8201-8210.
7. Wang, X.; Zhang, S.; Shao, M.; Huang, J.; Deng, X.; Hou, P.; Xu, X. Fabrication of ZnO/ZnFe<sub>2</sub>O<sub>4</sub> Hollow Nanocages Through Metal Organic Frameworks Route with Enhanced Gas Sensing Properties. *Sensor. Actuat. B: Chem.*, **2017**, *251*, 27.
8. Qu, F.; Jiang, H.; Yang, M. MOF-derived Co<sub>3</sub>O<sub>4</sub>/NiCoO<sub>4</sub> double-shelled nanocages with excellent gas sensing properties. *Mater. Lett.*, **2017**, *190*, 75.-78.
9. Jang, J.-S.; Koo, W.-T.; Choi, S.-J.; Kim, I.-D. Metal Organic Framework-Templated Chemiresistor: Sensing Type Transition from P-to-N Using Hollow Metal Oxide Polyhedron via Galvanic Replacement. *J. Am. Chem. Soc.* **2017**, *139*, 11868-11876
10. Yassine, O.; Shekhah, O.; Assen, A. H.; Belmabkhout, Y.; Salama, K. N.; Eddaoudi, M. H<sub>2</sub>S Sensors: Fumarate-Based fcu-MOF Thin Film Grown on a Capacitive Interdigitated Electrode. *Angew. Chem. Int. Edit* **2016**, *55*, 15879-15883.
11. Bai, X.-Y.; Ji, W.-J.; Li, S.-N.; Jiang, Y.-C.; Hu, M.-C.; Zhai, Q.-G. Nonlinear Optical Rod Indium-Imidazolecarboxylate Framework as Room-Temperature Gas Sensor for

Butanol Isomers. *Cryst. Growth Des.* **2016**, *17*, 423-427.

12. Campbell, M. G.; Dincă, M. Metal–Organic Frameworks as Active Materials in Electronic Sensor Devices. *Sensors* **2017**, *17*, 1108.

13. Chen, E.-X.; Fu, H.-R.; Lin, R.; Tan, Y.-X.; Zhang, J. Highly Selective and Sensitive Trimethylamine Gas Sensor Based on Cobalt Imidazolate Framework Material. *ACS Appl. Mater. Inter* **2014**, *6*, 22871.

14. Campbell, M. G.; Liu, S. F.; Swager, T. M.; Dincă, M. Chemiresistive Sensor Arrays from Conductive 2d Metal–organic Frameworks. *J. Am. Chem. Soc.* **2015**, *137*, 13780-13783.

15. Wu, G.; Huang, J.; Zang, Y.; He, J.; Xu, G. Porous Field-effect Transistors Based on a Semiconductive Metal–organic Framework. *J. Am. Chem. Soc.* **2016**, *139*, 1360-1363.

16. Stassen, I.; Burtch, N.; Talin, A.; Falcaro, P.; Allendorf, M.; Ameloot, R. An updated roadmap for the integration of metal–organic frameworks with electronic devices and chemical sensors. *Chem. Soc. Rev.* **2017**, *46*, 3185-3241.

17. Sachdeva, S.; Socol, D.; Gravesteijn, D. J.; Kapteijn, F.; Sudhölter, E. J.; Gascon, J.; de Smet, L. C. Polymer–Metal Organic Framework Composite Films as Affinity Layer for Capacitive Sensor Devices. *ACS Sensors* **2016**, *1*, 1188-1192.

18. Chen, E.-X.; Yang, H.; Zhang, J. Zeolitic Imidazolate Framework as Formaldehyde Gas Sensor. *Inorg. Chem.* **2014**, *53*, 5411-5413.
